# Supplementary material
Source: ML conference proceedings conference paper supplement (https://proceedings.mlr.press/v108/liao20a.html)
Supplement: Supplementary file [file liao20a-supp.pdf]

## A Appendix

We now provide additional details for our results in Section 2 of the paper.

**Lemma 1.** *Let  $A, B$  be full column rank matrices of size  $n \times d$ , with  $\log(n) = d^{o(1)}$ . Let  $S$  be an SRHT with<sup>1</sup>  $m = \tilde{O}((d + \log(1/\delta))/\epsilon^2)$  rows. For any matrix  $B$  of size  $n \times d$  we have*

$$\|X\|_2 = \|(SA)^\dagger SB\|_2 \lesssim \|A^\dagger B\|_2 + \epsilon \|\Sigma^{-1}\|_2 \sqrt{(1 + d/k)(\|B\|_2^2 + \|B\|_F^2/k)},$$

with probability  $1 - 1/\text{poly}(d)$ .

*Proof.* From Equation 5 in the body and the triangle inequality, we have

$$(SA)^\dagger SB = V\Sigma^{-1} \left( \sum_{k=0}^{\infty} T^k \right) U^T S^T SB \quad (1)$$

$$\|(SA)^\dagger SB\|_2 \leq \|A^\dagger B\|_2 + \|(SA)^\dagger SB - A^\dagger B\|_2 \quad (2)$$

$$\leq \|A^\dagger B\|_2 + \|V\Sigma^{-1} \left( \sum_{k=0}^{\infty} T^k \right) U^T S^T SB - V\Sigma^{-1} U^T B\|_2 \quad (3)$$

$$\leq \|A^\dagger B\|_2 + \|\Sigma^{-1}\|_2 \sum_{k=0}^{\infty} \epsilon^k \|U^T S^T SB - U^T B\|_2 \quad (4)$$

$$\leq \|A^\dagger B\|_2 + \|\Sigma^{-1}\|_2 \frac{\epsilon}{1 - \epsilon} \sqrt{(1 + d/k)(\|B\|_2^2 + \|B\|_F^2/k)} \quad (5)$$

where we used equation 8 in the body in the last step.  $\square$

### A.1 AD

Let us manually derive the AD for the least squares regression problem.

$$\begin{aligned} \text{LLS}(A, b) &= \text{LS}(A^T A, A^T b) \\ &= \text{LS}(M, m) \\ (M, m) &\equiv (A^T A, A^T b) \\ B &= A^T \\ (B_1, B_2) &= (B, B) \\ C &= B_1 A \\ d &= B_2 b \\ \bar{A}_M &= A\bar{M} + A\bar{M}^T \\ \bar{A}_m &= b\bar{m}^T \\ \bar{A} &= \bar{A}_M + \bar{A}_m \\ &= A\bar{M} + A\bar{M}^T + b\bar{m}^T \\ \bar{b} &= A\bar{m} \\ (\bar{M}, \bar{m}) &= \mathcal{J}^T(\text{LS})(M, m)(\bar{y}) \\ &= (-\bar{m}y^T, \text{LS}(M^T, \bar{y})) \\ &= (-\text{LS}(A^T A, \bar{y})y^T, \text{LS}(A^T A, \bar{y})) \end{aligned}$$

This gives us the final reverse mode AD:

$$\bar{A} = -A(A^T A)^{-1} \bar{y} y^T - A y \bar{y}^T (A^T A)^{-1} + b y^T (A^T A)^{-1} \quad (6)$$

$$\bar{b} = A(A^T A)^{-1} \bar{y} \quad (7)$$

<sup>1</sup>For a function  $f$ , we use the notation  $\tilde{O}(f)$  to denote  $f \cdot \text{polylog}(f)$ .

## A.2 Approximation bounds

Let us derive some additional bounds which were missing in the main paper:

$$\|Ay\bar{y}^T M^{-1} - Ay_D\bar{y}^T M_S^{-1}\|_F \leq \|Ay\bar{y}^T M^{-1} - Ay_D\bar{y}^T M^{-1}\|_F + \|Ay_D\bar{y}^T (M - M_S^{-1})\|_F \quad (8)$$

$$\leq \|U(I - (U^T S^T S U)^{-1})U^T b\|_F + \epsilon \|Ay_D\| \|\bar{y}\| \|\Sigma^{-1}\|_2 \|\Sigma^{-1}\|_F \quad (9)$$

$$\lesssim \epsilon (\|b\|_2 + \|b\|_2 \|\bar{y}\|_2 \|\Sigma^{-1}\|_2 \|\Sigma^{-1}\|_F) \quad (10)$$

Table 1: Cheat sheet to derive AD.

| Original              | Forward Transform                                                                                    | Reverse Transform                                                                                              |
|-----------------------|------------------------------------------------------------------------------------------------------|----------------------------------------------------------------------------------------------------------------|
| $z = a + b$           | $\dot{z} = \dot{a} + \dot{b}$                                                                        | $(\bar{a}, \bar{b}) = (\bar{z}, \bar{z})$                                                                      |
| $z = ab$              | $\dot{z} = \dot{a}b + a\dot{b}$                                                                      | $(\bar{a}, \bar{b}) = (\bar{z}b, a\bar{z})$                                                                    |
| $(z_1, z_2) = (a, a)$ | $(\dot{z}_1, \dot{z}_2) = (\dot{a}, \dot{a})$                                                        | $\bar{a} = \bar{z}_1 + \bar{z}_2$                                                                              |
| $Y = AXB$             | $\dot{Y} = \dot{A}YB$                                                                                | $\bar{X} = A^T \bar{Y} B^T$                                                                                    |
| $y = \text{LS}(M, m)$ | $\dot{y} = \mathcal{J} \text{LS}(M, m)(y, \dot{M}, \dot{m})$<br>$= \text{LS}(M, \dot{m} - \dot{M}y)$ | $(\bar{M}, \bar{m}) = \mathcal{J}^T \text{LS}(M, m)(y, \bar{y})$<br>$= (-\bar{m}y^T, \text{LS}(M^T, \bar{y}))$ |

Table 2: Forward mode AD Transformations.

| Type            | Primal                      | Forward Transform                                                                                                                                                                                     |
|-----------------|-----------------------------|-------------------------------------------------------------------------------------------------------------------------------------------------------------------------------------------------------|
| Regular         | $y = \text{LLS}(A, b)$      | $\dot{y} = \mathcal{J} \text{LLS}(A, b)(y, \dot{A}, \dot{b})$<br>$= \text{LS}(A^T \dot{A}, \dot{A}^T b + A^T \dot{b} - (\dot{A}^T A + A^T \dot{A})y)$                                                 |
| “Diff + Sketch” | $y_D = \text{LLS}(A, b, S)$ | $\dot{y}_D = \mathcal{J} \text{LLS}(A, b)(y_D, \dot{A}, \dot{b}, S)$<br>$= \text{LS}(A^T S^T S \dot{A}, \dot{A}^T b + A^T \dot{b} - (\dot{A}^T A + A^T \dot{A})y_D)$                                  |
| “Sketch + Diff” | $y_S = \text{LLS}(A, b, S)$ | $\dot{y}_S = \mathcal{J} \text{LLS}(A, b)(y_S, \dot{A}, \dot{b}, S)$<br>$= \text{LS}(A^T S^T S \dot{A}, \dot{A}^T S^T S b + A^T S^T \dot{b}$<br>$- (\dot{A}^T S^T S \dot{A} + A^T S^T S \dot{A})y_S)$ |

Table 3: Reverse mode AD Transformations.

| Type            | Primal                        | Reverse Transform                                                                                                                                                                               |
|-----------------|-------------------------------|-------------------------------------------------------------------------------------------------------------------------------------------------------------------------------------------------|
| Regular         | $y = \text{LLS}(A, b)$        | $(\bar{A}, \bar{b}) = \mathcal{J}^T \text{LLS}(A, b)(y, \bar{y})$<br>$= (-A^T \bar{y} \bar{y}^T - Ay\bar{y}^T M^{-1} + b\bar{y}^T M^{-1}, A^T \bar{y})$                                         |
| “Diff + Sketch” | $y_D = \text{LLS}(A, b, S)$   | $(\bar{A}, \bar{b}) = \mathcal{J}^T \text{LLS}(A, b)(y, \bar{y})$<br>$= (-AM_S^{-1} \bar{y} y_D^T - Ay_D \bar{y}^T M_S^{-1} + b\bar{y}^T M_S^{-1}, A^T \bar{y})$                                |
| “Sketch + Diff” | $y_S = \text{LLS}_S(A, b, S)$ | $(\bar{A}_S, \bar{b}_S) = \mathcal{J}^T \text{LLS}_S(A, b, S)(y_S, \bar{y})$<br>$= (-S^T A_S^T \bar{y} y_S^T - S^T S A y_S \bar{y}^T M_S^{-1} + S^T S b \bar{y}^T M_S^{-1}, S^T A_S^T \bar{y})$ |

### A.3 “Sketch and Differentiate”

**Lemma 2.** *The reverse mode approximation error for the term  $\bar{b}$  when we approximate it by sketching matrix  $S$  can be bounded with probability  $1 - \delta$  as follows:  $\|\bar{b} - \bar{b}_S\|_2 \leq \|\Sigma^{-1}\|_2 \|\bar{y}\|_2 (\epsilon + (1 + \epsilon)\|I - S^T S\|_2)$ .*

*Proof.* Let us use Lemma 1 and sub-multiplicativity to obtain the following:

$$\begin{aligned}
\|\bar{b} - \bar{b}_S\|_2 &= \|AM^{-T}\bar{y} - S^T SAM_S^{-T}\bar{y}_S\|_2 \\
&= \|AM^{-1}\bar{y} - AM_S^{-1}\bar{y} + AM_S^{-1}\bar{y} - S^T SAM_S^{-1}\bar{y}\|_2 \\
&\leq \|AM^{-1} - AM_S^{-1}\|_2 \|\bar{y}\|_2 + \|I - S^T S\|_2 \|AM_S^{-1}\|_2 \|\bar{y}\|_2 \\
&\leq \epsilon \|\Sigma^{-1}\|_2 \|\bar{y}\|_2 + \|I - S^T S\|_2 \|AM_S^{-1}\|_2 \|\bar{y}\|_2 \\
&\leq \|\Sigma^{-1}\|_2 \|\bar{y}\|_2 (\epsilon + (1 + \epsilon)\|I - S^T S\|_2)
\end{aligned} \tag{11}$$

□

where we used a lemma from the main paper. So, the error can be large ( $\|I - S^T S\|_2$ ).

**Lemma 3.** *The reverse mode approximation error for the term  $\bar{A}$  when we approximate it using the sketching matrix  $S$  can be bounded with probability  $1 - \delta$ .*

*Proof.*

$$\begin{aligned}
\|\bar{A} - \bar{A}_S\|_F &= \|-2AM^{-T}\bar{y}y^T + b\bar{y}^T M^{-1} - (-2S^T SAM_S^{-T}\bar{y}_S y_S^T + S^T S b\bar{y}_S^T M_S^{-1})\|_F \\
&\leq \|2AM^{-1}\bar{y}y^T - 2S^T SAM_S^{-1}\bar{y}_S y_S^T\|_F + \|b\bar{y}^T M^{-1} - S^T S b\bar{y}_S^T M_S^{-1}\|_F
\end{aligned} \tag{12}$$

$$\begin{aligned}
\|AM^{-1}\bar{y}y^T - S^T SAM_S^{-1}\bar{y}_S y_S^T\|_F &\leq \|AM^{-1}\bar{y}y^T - AM_S^{-1}\bar{y}_S y_S^T\|_F + \|AM_S^{-1}\bar{y}_S y_S^T - S^T SAM_S^{-1}\bar{y}_S y_S^T\|_F \\
&\leq \epsilon \|\Sigma^{-1}\|_F \|\bar{y}\| \|y\| + \|AM_S^{-1}\bar{y}_S y_S^T - S^T SAM_S^{-1}\bar{y}_S y_S^T\|_F
\end{aligned} \tag{13}$$

□

### A.4 “Differentiate and Sketch”

**Lemma 4.** *The reverse mode approximation error for the term  $\bar{b}$  when we sketch only the computationally expensive terms by  $S$ , with probability at least  $1 - \delta$ , satisfies:  $\|\bar{b} - \bar{b}_S\|_2 \lesssim \epsilon \|\Sigma^{-1}\|_2 \|\bar{y}\|_2$ .*

*Proof.* Let us use the sketching properties and sub-multiplicativity to obtain the following:

$$\begin{aligned}
\|\bar{b} - \bar{b}_S\|_2 &= \|AM^{-T}\bar{y} - AM_S^{-T}\bar{y}_S\|_2 \\
&\approx \|U(I - U^T S^T S U)\Sigma^{-1}V^T\bar{y}\|_2 \quad \bar{y} \approx \bar{y}_S \\
&\lesssim \epsilon \|U\|_2 \|\Sigma^{-1}\|_2 \|\bar{y}\|_2 \\
&\lesssim \epsilon \|\Sigma^{-1}\|_2 \|\bar{y}\|_2
\end{aligned} \tag{14}$$

□

**Lemma 5.** *The reverse mode approximation error for the term  $\bar{A}$  when we sketch only the computationally expensive terms by  $S$ , with probability  $1 - 1/\text{poly}(d)$ , satisfies:  $\|\bar{A} - \bar{A}_S\|_2 \lesssim \epsilon \|\bar{y}\|_2 (\|\Sigma^{-1}\|_2 \|y\|_2 + \frac{1}{1-\epsilon} \|\Sigma^{-1}\|_2 \|Ay - b\|_2 \|A^\dagger\|_2)$ .*

*Proof.* The approximation error can be split into 3 terms such that  $\|\bar{A} - \bar{A}_S\| \leq Q_1 + Q_2 + Q_3$  where:

$$\begin{aligned}
Q_1 &= \|b\bar{y}^T M^{-1} - b\bar{y}_S^T M_S^{-1}\|_F \\
&\leq \epsilon \|b\bar{y}^T\|_F \|\Sigma^{-1}\|_2 \|\Sigma^{-1}\|_F
\end{aligned}$$

Let us bound  $Q_2$  as follows:

$$\begin{aligned}
Q_2 &= \|AM^{-1}\bar{y}y^T - AM_{S'}^{-1}\bar{y}y_S^T\|_F = \|A(M^{-1} - M_{S'}^{-1})\bar{y}y^T + AM_{S'}^{-1}\bar{y}y^T - AM_{S'}^{-1}\bar{y}y_S^T\|_F \\
&\leq \|A(M^{-1} - M_{S'}^{-1})\bar{y}y^T\|_F + \|AM_{S'}^{-1}\bar{y}(y - y_S)^T\|_F \\
&\leq \epsilon\|\Sigma^{-1}\|_2\|\bar{y}y^T\|_F + \|AM_{S'}^{-1}\|_2\|\bar{y}(y - y_S)^T\|_F \\
&\leq \epsilon\|\Sigma^{-1}\|_2\|\bar{y}\|_2\|y\|_2 + \|AM_{S'}^{-1}\|_2\|\bar{y}\|_2\|(y - y_S)\|_2 \\
&\leq \epsilon\|\bar{y}\|_2(\|\Sigma^{-1}\|_2\|y\|_2 + \|AM_{S'}^{-1}\|_2\|Ay - b\|_2\|A^\dagger\|_2) \\
&\leq \epsilon\|\bar{y}\|_2(\|\Sigma^{-1}\|_2\|y\|_2 + (1 + \epsilon)\|\Sigma^{-1}\|_2\|Ay - b\|_2\|A^\dagger\|_2)
\end{aligned} \tag{15}$$

where we used the following result [Price et al. \(2017\)](#):

$$\|y - y_S\|_2 \leq \epsilon\|Ay - b\|_2\|A^\dagger\|_2 \tag{16}$$

and the last term  $Q_3$  can be bounded as:

$$Q_3 = \|Ay\bar{y}^T M^{-1} - Ay_S\bar{y}^T M_S^{-1}\| = \|Ay\bar{y}^T(M^{-1} - M_S^{-1}) + Ay\bar{y}^T M_S^{-1} - Ay_S\bar{y}^T M_S^{-1}\| \tag{17}$$

$$\begin{aligned}
&\leq \epsilon\|Ay\bar{y}^T\| + \|A(y - y_S)\bar{y}^T M_S^{-1}\| \\
&\leq \epsilon\|Ay\bar{y}^T\| + \epsilon\|A\|\|Ay - b\|\|\bar{y}^T M_S^{-1}\|
\end{aligned} \tag{18}$$

Note that all three terms  $Q_1, Q_2, Q_3$  are  $O(\epsilon)$ .  $\square$

## B Experiments

We plot the performance of the two proposed approaches for obtaining forward and reverse mode AD in the case of linear regression. We generate a linear regression problem by choosing the entries of matrix  $A$  and vector  $b$  from i.i.d.  $N(0, 1)$  (Normal distribution with mean 0 and variance 1). The differences from the two approaches, “sketch+differentiate” and “differentiate+sketch” are shown in Figure 1.

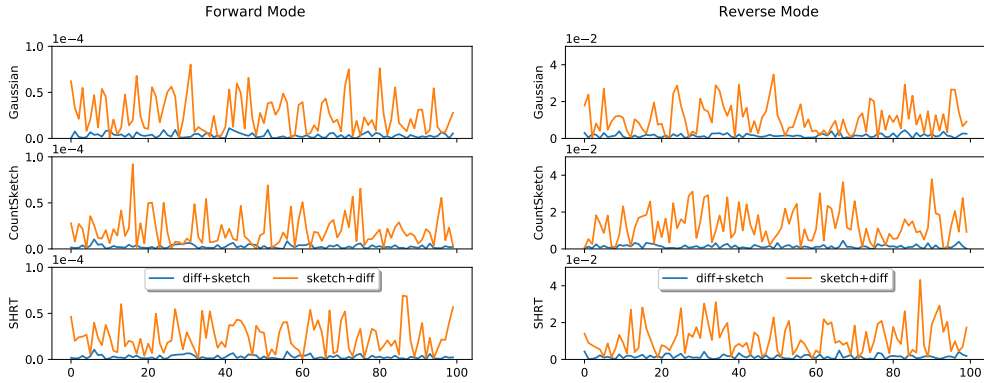

Figure 1: Numerical observation that differentiation and sketching do not commute, and that differentiation-then-sketch is more accurate. We show the forward mode along with its approximation corresponding to the three sketching matrices of Gaussian, Count-sketch and Subsampled Randomized Hadamard Transform (SRHT), on a randomly generated least squares problem of size  $100000 \times 100$ , along with a random perturbation. Reverse mode is shown for a subsample of 100 randomly chosen values for the variable  $b$ , where we used sign as the cost function.

## References

Eric Price, Zhao Song, and David P. Woodruff. Fast regression with an  $l_\infty$  guarantee. In *44th International Colloquium on Automata, Languages, and Programming, ICALP 2017, July 10-14, 2017, Warsaw, Poland*, pages 59:1–59:14, 2017. doi: 10.4230/LIPIcs.ICALP.2017.59.
